# Supplementary material for: Stereotactic body radiation therapy as a salvage treatment for single viable hepatocellular carcinoma at the site of incomplete transarterial chemoembolization: a retrospective analysis of 302 patients
Source: BMC Cancer. 2022 Feb 16;22:175. doi: 10.1186/s12885-022-09263-3 (PMC8848650; doi:10.1186/s12885-022-09263-3)
Supplement: Supplementary file 4 — Additional file 4. [file 12885_2022_9263_MOESM4_ESM.xlsx]

## Sheet: Sheet1
Case no.	Sex	Age	ECOG_PS	Child-Pugh	Etiology	BCLC	Tumor size	AFP	Total session	BED	CR gain	Best response time	Local control		Intrahepatic recurrence		Distant metastasis		Overall survival
	1: Male	years		1: A	1: HBV	0: 0	cm	ng/mL			0: Yes	Months	0: No	Months	0: No	Months	0: No	Months	0: No	Months
	2: Female			2: B	2: HCV	1: A					1: No		1: Event		1: Event		1: Event		1: Event
					3: Others
1	1	69	0	1	3	0	1.5	19.5	5	112.5	0	4.1	0	45.3	1	4.1	0	45.3	1	45.3
2	2	67	0	1	1	0	1.2	4.3	7	112.5	0	1.4	0	49.3	1	9.5	0	49.3	0	49.3
3	1	47	0	1	1	0	1.9	71	8	112.5	0	3.1	0	48.7	1	29.6	0	48.7	0	48.7
4	1	56	0	1	1	0	1.9	14.2	9	112.5	0	1.3	0	48.2	1	8.4	1	32.9	0	48.2
5	1	57	1	1	1	1	2.3	3	3	112.5	0	2.6	1	44.6	0	48.4	0	48.4	0	48.4
6	1	70	0	1	3	0	1.8	14.7	1	112.5	0	5.6	0	14.2	1	5.6	0	14.2	1	14.2
7	2	56	0	1	1	0	1.2	8.1	3	112.5	0	3.6	0	21.1	1	8.9	1	18.3	1	21.1
8	1	76	0	1	1	1	2.1	4.6	2	112.5	0	1.5	0	48	0	48	0	48	0	48
9	1	61	0	1	1	1	2.1	12.5	3	112.5	0	1.5	0	47.9	1	8.5	0	47.9	0	47.9
10	1	58	0	1	1	1	2.4	29	3	112.5	0	1.9	0	22.8	1	4.1	1	16.3	1	22.8
11	2	67	0	1	2	0	1.2	118	3	112.5	0	12.6	0	41.3	0	41.3	0	41.3	1	41.3
12	2	76	0	1	3	1	2.5	23.3	2	112.5	0	7.3	0	46.3	0	46.3	0	46.3	0	46.3
13	1	60	0	1	2	0	1.8	9.7	14	112.5	0	4	0	46.8	1	22.1	0	46.8	0	46.8
14	1	66	0	1	1	0	1.2	2.9	4	112.5	0	3	0	46.3	1	9.4	0	46.3	0	46.3
15	1	75	1	1	2	1	2.2	2.5	7	112.5	0	4.8	0	46.3	1	14.5	0	46.3	0	46.3
16	1	70	0	2	1	1	3.1	19.5	5	112.5	0	4	0	46.1	0	46.1	0	46.1	0	46.1
17	1	60	0	1	1	1	2	131.2	3	112.5	0	13.2	0	45.4	0	45.4	1	40.8	0	45.4
18	1	65	0	1	1	1	2.5	1.7	4	112.5	0	2.3	0	45.6	1	36.2	0	45.6	0	45.6
19	2	61	2	2	2	1	1.2	53.3	2	112.5	0	4.3	0	45.6	1	38.4	0	45.6	0	45.6
20	1	54	2	2	1	1	2.1	5.6	2	112.5	0	4.8	0	32.9	0	32.9	0	32.9	1	32.9
21	1	65	0	1	1	1	2.2	145.8	6	112.5	0	3	0	43.7	1	9.8	1	40.3	0	43.7
22	1	58	0	1	1	0	1.7	2.1	6	112.5	0	1.3	0	44.2	1	33.5	1	9.3	0	44.2
23	1	74	2	1	3	1	2.1	6.3	1	112.5	0	8	0	44.9	1	3.7	0	44.9	0	44.9
24	1	59	0	1	1	0	1.6	42.7	1	112.5	0	1.7	0	45.1	1	4.4	0	45.1	0	45.1
25	1	45	0	2	1	1	2.8	178.8	1	112.5	0	4.4	0	16.6	0	16.6	0	16.6	1	16.6
26	1	56	0	1	3	0	1.5	6.8	1	112.5	0	2.4	0	44.5	1	41	0	44.5	0	44.5
27	1	51	0	1	1	1	3.5	32.6	8	112.5	0	5.3	0	43.9	0	43.9	1	9.3	0	43.9
28	2	73	0	1	1	1	2.1	2.9	1	112.5	0	9.5	0	18.2	1	9.5	0	18.2	1	18.2
29	2	81	1	1	3	0	1.7	27.1	2	112.5	0	1.7	0	43.8	1	11	0	43.8	0	43.8
30	2	58	0	1	1	1	3.1	48.8	2	112.5	0	1.7	0	43.8	1	4.6	0	43.8	0	43.8
31	1	60	0	1	1	1	2.5	5.8	5	112.5	0	9.7	0	43.3	1	8.7	0	43.3	0	43.3
32	2	58	0	1	1	1	2.3	31.9	4	112.5	0	3.7	1	32	1	5.6	0	41.4	0	41.4
33	2	57	1	1	1	0	1.4	23.9	19	112.5	0	3.6	0	41.9	1	17.6	0	29.4	0	41.9
34	1	71	0	1	2	1	2	57.4	7	112.5	0	4.3	0	20.9	1	4.3	0	20.9	1	20.9
35	1	60	0	1	1	0	1.7	5.8	3	112.5	0	3.5	0	41.4	0	41.4	1	14	0	41.4
36	1	60	0	1	1	1	2.5	3.5	7	112.5	0	3.6	0	28.1	1	6.8	1	11.6	1	28.1
37	2	62	0	1	1	0	1.2	735.3	4	112.5	0	3.3	0	41.4	0	41.4	0	41.4	0	41.4
38	2	75	0	1	1	0	1.7	8.5	2	79.2	0	1.5	0	8.7	0	8.7	1	7.1	0	40.9
39	1	63	0	1	1	0	1.3	4.2	3	150	0	3.6	0	40	0	40	0	40	0	40
40	1	65	0	1	1	0	1.5	2.2	2	150	0	2.2	0	39.8	1	16.8	0	39.8	0	39.8
41	2	71	0	1	2	1	2	96.8	2	112.5	0	3	0	40	0	40	0	40	0	40
42	1	77	0	1	2	1	2.3	7.6	2	112.5	0	7.4	0	39.7	0	39.7	0	39.7	0	39.7
43	1	52	0	1	1	0	1.5	7.7	2	112.5	0	5.4	0	39.5	1	28.3	0	39.5	0	39.5
44	1	56	0	1	1	0	1.1	28.1	1	150	0	0.7	0	39.3	1	31.9	0	39.3	0	39.3
45	1	77	0	2	3	1	1.7	1.8	2	112.5	0	2.9	0	18	0	18	0	18	1	18
46	1	70	0	1	1	0	1.8	9.9	4	112.5	0	3.4	0	29.4	1	6	1	25.6	1	29.4
47	1	74	0	2	1	1	2	44	7	112.5	0	0.5	0	30	1	6.3	0	30	1	30
48	1	51	0	1	1	1	2.1	1.6	2	112.5	0	6.8	0	38.3	0	38.3	0	38.3	0	38.3
49	1	50	0	1	1	0	1.6	15.7	5	112.5	0	3.3	0	38.3	1	17.8	0	38.3	0	38.3
50	1	41	0	1	1	1	2.2	12.4	3	112.5	0	4.3	0	37.7	1	16.6	0	37.7	0	37.7
51	1	50	0	1	1	1	2.1	2.6	7	112.5	0	10.7	0	37.2	0	37.2	0	37.2	0	37.2
52	1	47	0	1	1	0	1.2	5	3	112.5	0	4	1	12.5	1	2	0	13.7	1	13.7
53	1	44	0	1	3	0	1.2	4	1	112.5	0	1.4	0	36.7	0	36.7	0	36.7	0	36.7
54	1	45	0	1	1	0	0.8	154	6	112.5	0	4.1	0	36.5	1	21.2	0	36.5	0	36.5
55	2	71	0	1	2	1	2.6	21.7	1	112.5	0	4.9	0	36.3	1	4.9	0	36.3	0	36.3
56	1	90	1	1	2	0	1.6	10.8	1	112.5	0	3.3	0	36.3	1	6.8	0	36.3	0	36.3
57	1	73	1	1	2	0	1.1	14	9	112.5	0	1.5	0	28.9	1	20.9	0	28.9	1	28.9
58	1	61	0	1	1	1	2.4	10.3	3	112.5	0	3.3	0	35.1	0	35.1	0	35.1	0	35.1
59	1	73	0	1	1	0	1.7	3.1	7	112.5	0	3.2	0	34.9	1	3.2	0	34.9	0	34.9
60	1	42	0	1	1	0	1.5	60	4	112.5	0	4.3	0	34.6	1	33.7	0	34.6	0	34.6
61	2	80	0	1	1	0	1.7	215.3	1	112.5	0	1.9	0	11.6	1	9.2	0	11.6	0	61.6
62	1	73	0	1	1	0	0.9	27.7	9	112.5	0	1	0	46.7	1	21.5	0	46.7	0	61.3
63	1	54	1	2	1	1	1.3	37.6	2	112.5	0	4.4	0	8.1	1	7.4	0	8.1	1	13.5
64	1	42	0	1	1	0	1.5	119.1	5	112.5	0	1.9	1	9.2	1	9.2	1	33.1	1	40.3
65	1	71	0	1	1	0	1	71.1	2	112.5	0	1.8	0	59.7	0	59.7	0	59.7	0	60.9
66	1	51	0	2	1	1	2	208.3	3	79.2	0	1.9	0	20.3	1	4.7	1	17.2	1	20.7
67	1	49	0	1	1	0	0.8	3.8	6	112.5	0	2.7	0	54.4	1	9	1	52.3	1	54.7
68	1	79	0	1	3	1	2.2	98.7	5	112.5	0	0.9	0	56.7	0	56.7	0	56.7	0	60.8
69	1	45	0	1	1	0	1.6	2.5	3	112.5	0	4.1	0	29.8	0	29.8	1	16.7	1	29.8
70	1	42	0	1	1	0	1.3	3.2	3	150	0	2.2	0	60	1	25.8	1	57.4	0	60.6
71	2	64	0	1	1	0	1.2	82.5	9	112.5	0	4.1	0	34.5	1	11	0	34.5	1	34.9
72	1	59	0	1	1	0	1.7	3.5	1	112.5	0	3.2	0	57.6	0	57.6	0	57.6	0	60.6
73	1	71	0	1	3	0	1.9	5.7	2	150	0	3.6	0	58.1	1	24.6	0	58.1	0	60.4
74	1	71	0	1	2	1	2.1	50.9	1	112.5	0	6.4	1	14.3	1	13.1	0	20.4	1	35.9
75	1	64	0	1	1	1	2.3	4.3	1	112.5	0	3.1	0	40.5	1	3.1	0	40.5	0	42.2
76	1	56	0	1	1	1	2.2	9.7	3	150	0	1.3	0	59	1	11.2	0	59	1	59
77	1	51	0	1	3	0	1.8	9.5	2	112.5	0	6	0	38.8	0	38.8	0	38.8	1	43.6
78	1	59	0	1	3	0	1.4	38.2	1	150	0	8.8	0	47.2	0	47.2	0	47.2	0	47.6
79	2	68	0	1	1	1	4.1	1401.3	10	150	0	1.3	0	34.5	1	3.3	1	12.6	1	34.8
80	1	70	0	1	1	0	1.7	11.2	3	150	0	3.5	0	46.5	1	8.9	0	46.5	0	47.1
81	1	46	0	1	1	0	1.1	10.8	2	150	0	3.2	0	44.2	0	44.2	0	44.2	0	47.2
82	1	59	0	1	1	0	1.6	773	12	112.5	0	3.5	0	18.1	1	3.5	1	10.7	1	19.2
83	2	58	0	1	1	1	2.2	6	2	112.5	0	2	0	45.6	0	45.6	0	45.6	0	46.8
84	2	61	0	1	1	1	3.6	308	3	112.5	0	6.1	0	11.3	0	11.3	0	11.3	1	18.5
85	1	60	0	1	1	1	2.3		5	150	0	1.5	0	45.2	1	20.9	0	45.2	0	45.9
86	1	50	0	2	1	1	3.7	47.6	1	112.5	0	4.5	0	46.6	1	32.6	0	46.6	0	46.6
87	2	73	0	1	2	1	2.2	5.8	1	112.5	0	6.3	0	6.3	0	6.3	0	6.3	0	45.7
88	1	64	0	1	1	1	2.6	3.4	8	112.5	0	4.1	0	45.3	1	9.5	0	45.3	0	45.7
89	1	70	0	1	3	1	3.6	171.6	2	112.5	0	4	0	42.7	0	42.7	0	42.7	0	45.5
90	1	64	0	1	1	1	2.7	3.2	3	112.5	0	4.2	0	16.7	1	4.2	0	16.7	0	17
91	1	68	0	1	1	0	1.8	4.6	2	112.5	0	1.9	0	45.6	1	21.2	0	45.6	0	45.6
92	1	69	0	2	2	1	1.2	57.2	3	112.5	0	0.7	0	20.6	0	20.6	0	20.6	1	23.4
93	1	56	0	1	1	0	1.5	1.5	1	112.5	0	1.7	0	42.5	0	42.5	0	42.5	0	44.7
94	2	77	0	1	1	1	2.5	58.7	1	112.5	0	3	0	16.7	1	6.5	1	14.1	1	19.7
95	1	70	0	1	1	1	3.3	1.8	1	112.5	0	5.9	0	40.6	1	15	0	40.6	0	44.5
96	1	64	0	1	1	1	2.3	3.5	5	112.5	0	1.7	0	42.6	0	42.6	0	42.6	0	44.3
97	2	71	0	1	3	0	1.9	15.3	1	112.5	1	41.2	1	41.2	0	43.9	0	43.9	0	43.9
98	1	61	0	1	1	1	2.4	21.6	4	112.5	0	4.8	0	43.6	1	7.4	1	20.6	0	43.8
99	1	64	0	1	1	0	1.3	6.2	3	112.5	0	3.4	0	23.9	1	9.9	1	23.9	1	24.3
100	2	65	0	1	1	0	1.1	5.4	3	112.5	0	1.7	0	43	0	43	0	43	0	43.3
101	1	63	0	1	3	1	2.7	4	1	112.5	0	1.8	0	43.4	1	5.9	0	43.4	0	43.4
102	1	67	0	1	1	0	1.5	26.7	4	112.5	0	7.5	0	35.9	1	3.2	1	19.9	1	36.2
103	1	49	0	2	1	1	2.2	24.6	1	112.5	0	10.3	0	14.4	1	5.4	0	36.5	0	42.7
104	2	72	0	1	1	1	2.3	24.1	2	112.5	0	7.8	0	38.3	0	38.3	0	38.3	0	42.7
105	2	74	0	1	1	0	1.7	368	2	112.5	0	1.4	0	41.1	1	11.2	1	39	0	42.7
106	2	50	0	1	1	0	1.8	4.5	2	112.5	0	6.5	0	12.1	0	12.1	0	12.1	1	12.6
107	2	64	1	1	1	1	3.4	11.5	4	112.5	0	1.4	0	4.5	1	3.2	1	3.2	1	5.2
108	2	45	1	1	1	0	1.3	93.9	3	112.5	0	6.3	0	25.6	1	20.7	1	1.5	1	29
109	1	67	0	1	1	0	1.3	5.8	8	112.5	0	5.1	0	40.4	1	5.1	0	40.4	0	41.3
110	1	50	0	1	1	1	2.9	226.2	4	112.5	0	2.1	0	39	1	2.1	1	14.4	0	41.7
111	2	75	2	1	2	1	2.3	1126.1	3	112.5	0	10.2	0	40.7	0	40.7	0	40.7	0	41.7
112	1	69	0	1	2	1	2.6	10.5	2	112.5	0	4	1	41.4	0	41.4	0	41.4	0	41.7
113	1	62	0	1	1	0	1.6	3.7	12	112.5	0	0.9	0	31.5	1	4.5	0	31.5	1	31.8
114	2	55	0	1	1	0	1.1	42.4	6	79.2	0	3.3	1	17.3	1	8.4	0	28.4	1	30.4
115	1	54	0	1	1	1	2.4	6.1	24	112.5	1	22.4	0	22.4	1	10	0	22.4	1	25.3
116	1	56	0	1	1	0	1.9	111.2	6	112.5	0	3.5	0	34.3	1	3.5	1	25.5	1	34.7
117	2	68	0	1	1	0	1.2	2.7	1	112.5	0	3.1	0	42.1	1	34.3	0	42.1	0	42.1
118	2	64	0	1	3	1	2.3	11.5	1	112.5	0	4.1	0	8.8	0	8.8	0	8.8	0	40.8
119	1	62	0	1	1	0	1.9	1.9	2	180	0	3.4	0	39.1	0	39.1	0	39.1	0	40
120	1	69	0	1	1	1	2	14	7	112.5	0	9.4	0	36.2	1	0.5	1	36.2	1	37.7
121	1	48	0	1	1	0	1.2	42.5	4	112.5	0	4.1	0	41.6	0	41.6	0	41.6	0	41.6
122	2	73	0	1	1	0	1.7	18.7	1	112.5	0	1.6	0	8.3	0	8.3	0	8.3	0	40
123	1	76	0	2	3	1	3.5	5	1	112.5	0	8.3	0	31.6	1	31.6	0	31.6	1	44.1
124	1	48	0	2	1	1	1.9	9.8	1	112.5	0	4.5	0	4.5	0	4.5	0	4.5	1	8.4
125	1	59	0	1	1	1	2.5	11.5	3	112.5	0	5.6	0	39.4	1	14.7	0	39.4	0	39.4
126	2	75	0	1	1	0	1.4	7.9	4	112.5	0	2.7	1	36	1	19.5	0	42.5	0	43.9
127	1	73	0	1	1	1	2.3	2.9	3	112.5	0	5.4	0	41.6	0	41.6	0	41.6	0	43.3
128	1	66	0	1	3	1	3.7	18.9	3	112.5	0	1.5	0	29.7	1	9.6	0	29.7	1	32.6
129	1	76	0	1	2	0	1.5	3.4	1	112.5	0	3.3	0	43.3	1	36.5	0	43.3	0	43.4
130	2	71	0	1	2	0	1.4	67.3	1	112.5	0	1.1	0	40.5	0	40.5	0	40.5	0	43
131	1	64	0	1	2	1	3	3.7	4	112.5	0	4	0	42.9	1	24.2	0	42.9	0	42.9
132	1	67	0	1	1	0	1.7	2.6	3	112.5	0	4	0	42.3	1	9	0	42.3	0	42.8
133	2	67	0	1	1	0	1.1	15.6	4	112.5	0	3.2	0	42.6	1	3.2	0	42.6	0	42.8
134	2	68	0	1	1	0	1.8	2.8	7	112.5	0	3.7	0	40.2	0	40.2	0	40.2	0	42.3
135	1	37	0	1	1	0	1.2	7.6	2	112.5	0	2.7	0	42.6	1	12.5	0	42.6	0	42.6
136	1	79	0	2	3	1	2.1	10.6	1	79.2	0	4.3	0	12.7	0	12.7	0	12.7	1	29.5
137	1	61	0	1	1	1	2.2	1	9	112.5	0	6	1	40.9	1	3.9	0	43.2	0	43.2
138	2	58	0	1	1	0	1.6	2.1	1	112.5	0	2.6	0	42.8	0	42.8	0	42.8	0	42.8
139	1	73	0	1	2	0	1.2	5.6	3	112.5	0	6	0	42.2	1	17.8	0	42.2	0	42.3
140	1	72	1	1	1	1	3.6	70.9	21	112.5	0	3.4	0	40.6	1	7.1	0	40.6	0	42.1
141	2	74	1	1	3	0	1.7	1.5	4	112.5	0	2.6	0	20.2	1	8.1	0	20.2	1	21.1
142	1	62	0	1	1	0	1.5	3.5	2	112.5	0	4.2	0	41.6	0	41.6	0	41.6	0	42
143	1	58	0	1	1	1	3.3	4.6	3	112.5	0	1.1	0	2.4	0	2.4	1	1.7	1	2.9
144	2	65	0	1	1	0	1.5	113.7	2	112.5	0	4.7	0	42.7	0	42.7	0	42.7	0	42.7
145	1	57	0	1	2	0	1.4	2.7	3	112.5	0	0.6	0	40.7	1	37.6	0	40.7	0	41.1
146	1	55	0	1	1	1	5.8	2386.4	2	112.5	0	3.1	1	6.6	1	3.1	1	28.6	1	38.3
147	1	63	0	1	1	0	1.4	5.1	4	112.5	0	4	0	42.6	1	8.9	0	42.6	0	42.6
148	2	60	0	1	1	1	2.4	8.3	1	112.5	0	4.4	0	35.8	0	35.8	0	35.8	0	37.9
149	1	50	0	1	1	1	3.2	20.9	1	112.5	0	13.3	0	41.3	0	41.3	0	41.3	0	41.1
150	1	45	0	1	1	1	2.5	1.7	3	112.5	0	2	0	40.7	1	9.7	1	21.8	0	40.7
151	1	62	0	1	1	1	2.7	2.2	4	112.5	0	3.5	0	39.4	1	33.2	0	39.4	0	40.8
152	1	72	0	2	1	1	3.1	27	1	112.5	0	3.6	0	10.6	0	10.6	0	10.6	1	21
153	1	49	0	1	1	0	1.8	3	1	112.5	0	1.7	0	36.4	0	36.4	0	36.4	0	40.6
154	1	64	0	1	2	1	3.2	11.8	5	112.5	0	2.7	0	39.1	1	2.7	0	39.1	0	40.4
155	1	52	0	1	1	0	1.6	361	1	112.5	0	2.6	0	41	1	0.9	0	41	0	41
156	1	47	0	1	1	0	1.7	3.7	1	112.5	0	3.1	0	36.2	0	36.2	0	36.2	0	39.6
157	1	74	0	1	1	1	2.2	73.5	4	112.5	0	1.6	0	5.9	1	2.7	1	5.9	1	7.6
158	2	69	0	1	1	0	1.5	9	1	112.5	0	4	0	36.4	0	36.4	0	36.4	0	39.4
159	1	61	0	1	3	1	2.2	2.3	2	112.5	0	6.8	0	28.1	1	25.6	0	28.1	1	28.6
160	1	63	0	1	1	0	1.3	5.4	7	112.5	0	3.5	0	40.3	1	10.9	0	40.3	0	40.3
161	1	66	0	1	1	0	1.6	222.4	1	112.5	0	2.8	0	32.9	0	32.9	0	32.9	0	36.4
162	1	70	0	1	3	0	1.6	14.1	2	112.5	0	1.5	0	27.1	1	19	0	27.1	1	29.3
163	1	49	0	1	1	1	2.7	5	2	112.5	0	6	0	39.5	1	11.9	0	39.5	0	39.5
164	1	66	0	1	1	0	1.9	3.8	1	112.5	0	1.6	0	37.8	0	37.8	0	37.8	0	38.5
165	1	67	0	1	1	1	2.7	6.8	1	124.8	0	4.3	1	25.3	0	40.1	0	40.1	0	40.1
166	1	61	0	1	1	1	3.6	19.2	3	112.5	0	2.8	0	37.7	0	37.7	1	10	0	38.9
167	1	57	0	1	1	0	0.7	8.4	1	112.5	0	1.2	0	27.8	0	27.8	0	27.8	0	38.2
168	1	58	0	1	3	0	0.7	6.3	1	112.5	0	4.2	0	12	0	12	0	12	0	38.2
169	1	77	0	1	3	1	3	10.4	6	112.5	0	6.2	0	16	1	0.7	0	16	0	16
170	2	57	0	1	1	0	1.2	9.5	5	112.5	0	2	0	38.3	1	11.9	0	38.3	0	38.2
171	1	81	0	1	3	0	1.6	1.8	5	112.5	0	4.4	0	27.5	1	8	0	27.5	1	28.4
172	1	52	0	1	1	0	1.4	15.4	8	112.5	0	4.1	0	13.9	1	1.5	0	13.9	1	15.8
173	1	62	0	1	1	1	4	241	4	79.2	1	10.1	1	10.1	1	2.7	1	5.7	1	18.1
174	1	57	1	1	1	1	3.1	66.3	2	112.5	0	1.4	0	35.5	0	35.5	0	35.5	0	39.2
175	1	78	0	1	1	0	1.9	1.9	2	112.5	0	2.5	0	38.5	0	38.5	0	38.5	0	38.5
176	1	63	0	1	1	0	1.2	59.4	6	112.5	0	3.9	1	11.1	1	10	1	18.7	0	38.3
177	1	56	0	1	1	0	1.2	2	7	112.5	0	1.4	0	37.5	1	1.4	0	37.5	0	38.3
178	1	55	0	1	1	1	6.3	4.3	2	150	0	1.2	0	34.5	0	34.5	0	34.5	0	37.9
179	1	53	0	1	1	0	1.6	116.8	12	112.5	0	3.4	0	34.1	1	1.8	0	34.1	0	37.9
180	2	43	0	1	1	0	1.7	621.7	8	112.5	0	9.2	0	25.3	0	25.3	0	25.3	0	37.7
181	1	65	0	1	1	1	2.5	9.2	2	112.5	0	2.6	0	26.2	1	1.7	1	26.3	1	27.5
182	1	57	0	1	1	1	2.9	4.7	1	150	0	3.5	0	36.3	1	18.7	0	36.3	0	37.7
183	1	62	0	1	3	0	1.8	9.4	1	112.5	0	3.6	0	10.1	0	10.1	0	10.1	0	33.2
184	1	50	0	1	1	1	2.7	8.4	3	112.5	0	3.8	0	36.3	1	1.7	0	36.3	0	36.5
185	2	64	0	1	1	1	3.3	722.2	5	112.5	0	3.7	0	32.6	1	17.2	1	21	0	34.2
186	1	67	0	1	3	1	2.1	4.4	2	112.5	0	6.4	0	30.7	0	30.7	0	30.7	0	33.9
187	2	61	0	1	1	1	2.4	11.3	2	112.5	0	2.8	0	3.4	0	32.7	0	32.7	0	33.7
188	2	65	1	1	1	1	2.5	20	1	112.5	0	7.5	0	32	0	32	0	32	0	33.7
189	1	58	0	1	1	0	1.4	13.7	1	112.5	0	4.6	0	19.8	0	31.1	0	31.1	0	33.7
190	1	61	0	1	1	0	1.1	2.1	1	112.5	0	2.9	0	30.5	0	13.1	0	30.5	0	33.2
191	1	53	0	1	2	0	1.3	6.6	1	112.5	0	3.6	0	32.1	1	12.4	0	32.1	0	33.2
192	1	48	0	1	1	0	1.3	5.1	3	112.5	0	5.3	0	14.7	0	14.7	0	14.7	1	24.2
193	1	71	0	1	1	1	2.3	3.3	5	112.5	0	4	1	23.7	1	4	0	24.9	1	25
194	1	65	0	1	1	1	2	6.7	9	112.5	0	1.7	1	28.9	1	11.3	0	32.5	0	32.9
195	1	45	0	1	1	1	3.2	9.1	2	112.5	1	10	1	10	1	9.1	0	31.4	0	32.9
196	1	41	0	1	1	1	2.8	115.5	18	112.5	0	1.4	1	21.2	1	7	0	32	0	32.5
197	1	73	0	1	1	0	1.9	3.4	3	112.5	0	9.7	0	32	1	13.3	0	32	0	32.5
198	1	60	0	1	2	0	1.4	3.3	2	112.5	0	1.6	0	28.4	1	8.2	0	28.4	0	30.1
199	2	60	1	1	1	1	4	124.8	4	112.5	0	1.4	0	30.2	1	6.4	0	30.2	0	32.3
200	1	59	0	2	1	1	1.4	10.8	6	79.2	0	0.7	0	12.7	1	0.7	0	12.7	1	13.4
201	1	65	0	1	1	1	2	7.9	2	112.5	0	5.4	0	25.7	1	3	0	25.7	1	28.2
202	1	48	0	1	1	1	2	9.2	1	112.5	0	4.5	0	32.1	0	32.1	0	32.1	0	32.1
203	2	78	0	1	1	1	3.5	645	2	112.5	1	5	1	5	1	0.9	0	8.2	1	10.6
204	1	64	0	2	1	1	1.3	2.5	6	79.2	0	1.4	0	14.2	1	1.4	0	14.2	1	24.5
205	1	66	0	1	1	1	2.2	13.7	4	112.5	0	3.8	0	31	1	11.9	0	31	0	31.5
206	1	45	0	1	1	0	1.3	3.7	1	112.5	0	5.7	0	30	0	30	0	30	0	31.4
207	1	76	0	1	3	1	2.7	4.1	2	112.5	1	8.2	0	8.2	0	8.2	0	8.2	0	31.4
208	1	71	0	1	1	1	2.3	2.1	9	112.5	0	5.3	0	31.1	1	0.2	0	31.1	0	31.1
209	2	61	0	1	1	0	1.6	3556.9	1	112.5	0	4	0	14.5	1	10.7	0	24.9	0	30.7
210	1	61	0	1	1	1	3	14.9	7	112.5	0	2.6	1	12.7	0	28.8	1	16.9	0	30.6
211	2	75	0	1	1	1	2.8	5.4	2	112.5	0	8.7	0	15	0	15	0	15	1	18.9
212	1	51	0	1	1	0	1.3	166.2	3	112.5	0	5.6	0	29.4	1	2.7	0	29.4	0	30.2
213	1	58	0	1	1	0	1.7	3.3	1	112.5	0	4.5	0	7.8	0	7.8	0	7.8	1	11.3
214	1	63	0	1	1	1	5	5.9	9	112.5	0	6.2	0	30.4	1	6.2	0	30.4	0	30.4
215	1	76	0	1	2	0	1.7	19.2	4	112.5	1	6.4	0	6.4	1	1.5	0	29.3	0	29.7
216	1	65	0	1	1	1	3.2	737.8	2	112.5	0	1.8	0	8.1	1	3.9	0	8.1	1	26.7
217	2	43	0	2	1	1	2.1	57.3	1	79.2	0	2.2	0	25.3	0	25.3	0	25.3	0	30.4
218	1	46	0	1	1	1	2.3	10.5	9	112.5	0	7.9	0	24.4	1	7.9	0	24.4	0	30.8
219	1	52	0	1	1	1	2.1	28.3	2	112.5	0	0.8	0	29	0	29	0	29	0	29
220	1	74	0	1	2	0	1.9	11.9	18	112.5	0	2.8	0	28.1	1	8.4	0	28.1	0	29.6
221	1	63	0	1	1	1	6.9	2.3	5	79.2	0	1.6	1	3.9	0	7.8	0	7.8	1	10.3
222	1	67	0	1	3	1	2.4	5.2	4	112.5	0	1.9	1	15.7	0	27.7	0	27.7	0	29.4
223	2	68	0	1	1	1	2.2	70.8	9	112.5	1	1.4	1	8.6	1	1.4	0	9	1	16.3
224	1	69	1	1	2	0	1.9	9	9	112.5	0	3.4	0	21.7	1	1	0	21.7	1	23.4
225	1	58	0	1	1	1	2.1	3.9	3	112.5	0	3.8	1	24.8	0	27.4	0	27.4	0	28.9
226	1	66	0	1	1	1	4.3	4.3	7	124.8	1	6.9	0	6.9	0	27.7	0	27.7	0	29.1
227	1	63	0	1	1	1	3.1	7.2	3	112.5	0	3.9	0	12.6	1	3.9	0	12.6	1	13.3
228	1	65	0	1	1	1	3.4	1.3	8	150	0	5.4	0	10.4	1	5.4	1	7	1	10.5
229	1	53	0	1	1	0	1.8	30	5	112.5	0	3.1	0	15.1	1	6.7	1	12.8	1	18.5
230	1	69	0	1	1	1	2.6	57.3	7	112.5	0	4.9	0	27	0	27	1	17.3	0	28.2
231	1	65	0	1	1	0	1.9	1.7	1	112.5	0	3.7	0	28.2	0	28.2	0	28.2	0	28.2
232	1	75	0	1	1	1	2.8	8.1	5	112.5	0	2.7	0	24.5	0	24.5	0	24.5	0	27.7
233	1	65	0	1	1	1	2.6	8.4	2	112.5	0	2.7	0	26.7	0	26.7	0	26.7	0	27.3
234	1	55	0	1	1	1	2.2	1.6	6	112.5	0	1.1	0	27	1	4.9	0	27	0	27.2
235	2	72	0	1	1	0	1.9	68.5	7	112.5	0	2.7	0	26.8	1	9.4	0	26.8	0	27.3
236	2	77	1	1	1	0	1.8	37.5	2	112.5	0	1.4	0	19.3	0	19.3	0	19.3	1	23.5
237	1	61	0	1	1	1	2.6	3.8	1	150	0	5	0	22.6	1	20.7	0	22.6	0	27.1
238	2	63	0	2	1	1	1.8	8.4	1	112.5	0	6.5	0	25.6	1	13	0	25.6	0	27.5
239	1	65	0	1	3	1	2.1	15.7	3	79.2	0	4.3	0	25.4	1	17.6	0	25.4	0	27.1
240	1	59	0	1	1	1	2.8	39	5	112.5	0	3.3	0	9.7	1	4.4	0	9.7	1	11.4
241	1	62	0	1	1	1	4.9	3.3	2	79.2	0	3.4	0	26.8	1	21.4	1	8.6	0	27
242	1	63	0	1	1	0	1.8	2.5	3	112.5	0	3.2	0	24.9	0	24.9	0	24.9	0	26.8
243	2	74	0	2	2	1	1.3	22.4	1	112.5	0	2.8	0	4.8	1	2.8	0	4.8	1	12.7
244	1	69	0	1	1	1	2.6	86.9	1	112.5	0	0.9	0	25.5	0	25.5	0	25.5	0	26.6
245	1	77	0	1	2	1	2.4	3.1	3	112.5	0	8.6	0	26.6	1	7.8	0	26.6	0	26.6
246	1	56	0	1	1	0	1.2	5.5	3	112.5	0	3	0	23.3	1	6.4	1	7.8	1	24
247	2	81	0	1	2	1	2.1	10.6	3	112.5	0	7.1	0	25.6	1	7.1	0	25.6	0	26.4
248	1	61	0	1	1	1	2.7	2.9	4	112.5	0	1.4	0	23.1	0	23.1	0	23.1	0	26.3
249	1	84	0	1	2	0	1.7	4.3	1	112.5	0	4.7	0	23.9	0	23.9	0	23.9	0	26.1
250	1	61	0	1	1	0	1.9	6.6	3	112.5	0	8.1	0	23.4	0	23.4	0	23.4	0	26.1
251	1	61	0	1	1	1	3.8	11	3	112.5	0	3.6	0	3.6	1	3.6	1	3.6	1	6.9
252	1	64	0	1	1	1	2.6	2.7	5	112.5	0	2.5	0	25.6	0	25.6	0	25.6	0	25.9
253	1	48	0	1	2	0	1	32.3	3	112.5	0	1.9	0	24.1	1	3.3	0	24.1	0	25.7
254	1	60	0	1	1	1	2.3	3.9	7	112.5	0	2	1	17.8	1	5.9	1	15	1	18.9
255	1	53	0	1	1	0	1.5	4.6	5	112.5	0	5.3	0	22.4	0	22.4	0	22.4	0	25.4
256	1	70	0	1	1	1	3.6	4	7	112.5	0	2.5	0	23.7	1	9.6	0	23.7	0	25.4
257	2	74	0	2	2	1	2.8	302.1	5	79.2	1	5.1	0	5.1	0	5.1	0	5.1	1	9.9
258	1	69	0	1	3	1	2.7	36.1	6	112.5	0	1.9	0	24.7	0	24.7	0	24.7	0	25.2
259	2	64	0	1	1	0	1	5.4	1	112.5	0	1.2	0	23.9	0	23.9	0	23.9	0	25
260	2	57	0	1	1	0	1	4.3	2	112.5	0	2.5	0	24.9	0	24.9	0	24.9	0	24.9
261	2	78	1	1	2	0	1.9	2.5	1	79.2	0	2	0	15	0	15	0	15	0	24.7
262	1	74	0	1	1	1	3.2	46.1	9	112.5	0	9.2	0	21.6	0	21.6	0	21.6	0	24.5
263	2	74	0	1	1	1	2.1	81.4	6	112.5	0	0.8	0	24.1	1	8.1	0	24.1	0	24.5
264	1	64	0	1	3	0	1	7.4	2	112.5	0	2.8	0	14.6	1	9.3	1	17.3	0	24.5
265	1	70	0	1	1	1	2.6	6.4	12	112.5	0	7.2	0	24.1	1	21.3	0	24.1	0	24.5
266	1	51	0	2	1	1	1.6	16.9	1	112.5	0	4	0	24.1	1	10.8	0	24.1	0	24.3
267	2	63	0	2	1	1	2.2	1252	1	79.2	0	7.4	0	10.7	0	10.7	0	10.7	1	13.8
268	1	63	0	1	1	1	2	4.1	8	112.5	0	4.7	0	8.3	1	4.7	0	22.7	0	23.8
269	1	66	0	1	1	1	2.6	4.1	2	112.5	0	9.1	0	22.7	1	14.9	0	22.7	0	23.6
270	1	68	0	1	1	0	1.5	4.2	3	112.5	0	6.8	0	22	1	6.8	0	22	0	23.6
271	1	65	0	1	3	0	1.3	13.6	5	112.5	1	5.7	0	5.7	1	5.7	0	22.7	0	23.5
272	1	75	0	1	2	1	5	7283.6	8	112.5	0	6.6	0	24.3	1	3.1	1	12.9	1	16
273	1	45	0	1	2	1	2.4	24.4	2	112.5	0	2.2	0	11.9	1	5.6	0	11.9	0	14.9
274	1	73	0	1	1	1	2.4	575.7	3	112.5	0	1.9	0	13.5	1	0.5	0	13.5	0	14.8
275	1	52	0	1	1	0	1.4	74.8	7	112.5	0	1.4	0	12.7	0	12.7	0	12.7	0	14.9
276	1	74	0	1	3	0	1.9	10.2	1	112.5	0	8	0	14.3	1	1.3	0	14.3	0	14.6
277	1	59	0	2	1	1	1.5	7.8	10	112.5	0	2.4	0	12.4	1	10.3	0	12.4	0	13.9
278	1	56	0	1	1	1	2.6	5.8	2	112.5	0	1.2	0	4.4	1	1.2	1	4.4	1	6.8
279	1	55	0	1	1	1	2.4	132.3	4	112.5	0	3.3	0	6.5	1	6.5	0	6.5	0	7.2
280	1	60	0	1	1	0	1.7	3.1	2	112.5	0	4.2	0	11.4	0	11.4	0	11.4	0	13
281	1	64	0	1	1	0	1.6	26.3	0	112.5	0	1.2	0	9.6	0	9.6	0	9.6	0	13.2
282	1	63	0	1	1	0	1.7	4.5	1	112.5	1	3.7	0	3.7	0	12	0	12	0	13.2
283	1	58	0	1	1	1	3.7	1.7	1	79.2	1	7.1	0	7.1	0	13.2	0	13.2	0	13.7
284	2	73	0	1	1	0	1.7	8.7	4	112.5	0	3	0	10	0	10	0	10	0	13.5
285	1	53	0	1	1	0	0.7	17.1	1	112.5	0	0.9	0	11.3	0	11.3	0	11.3	0	13
286	1	64	0	1	1	1	2.1	2.4	6	79.2	0	3	0	10.6	0	10.6	0	10.6	0	13.5
287	1	68	0	1	1	0	2	46.3	3	112.5	0	1.1	0	11.7	1	10.5	0	11.7	0	13.2
288	1	68	0	2	1	1	3.2	34	2	112.5	0	0.9	0	13.1	1	3.9	0	13.1	0	13.2
289	1	73	0	1	1	0	1.5	2.3	2	112.5	0	2.6	0	13.5	0	13.5	0	13.5	0	13.7
290	2	65	0	1	1	0	1.6	14	1	112.5	0	2.3	0	11.3	0	11.3	0	11.3	0	12.5
291	2	68	0	1	1	0	1.5	7	1	112.5	0	1.3	0	10.4	1	7.4	0	10.4	0	12.5
292	1	64	0	1	1	0	1.9	30.1	2	112.5	0	5	0	12.7	1	1.1	0	12.7	0	12.8
293	1	57	0	1	1	1	3.3	4.7	6	112.5	0	3.2	0	12.3	0	12.3	0	12.3	0	12.3
294	2	73	0	1	3	1	3.8	5.2	1	112.5	0	4.3	0	10.1	0	10.1	0	10.1	0	12.3
295	2	58	0	1	1	1	2.7	775.4	5	112.5	0	1.3	0	11.5	1	2.6	0	11.5	0	12.1
296	1	60	0	2	3	1	1.3	3.3	1	112.5	0	2.9	0	12.6	0	12.6	0	12.6	0	12.6
297	1	52	0	1	1	1	3.9	7.3	1	150	1	1.5	0	1.5	0	11.4	0	11.4	0	11.6
298	2	76	0	1	1	1	2.6	29.5	1	112.5	0	1.6	0	11.8	0	11.8	0	11.8	0	11.9
299	1	63	0	1	1	1	2.4	7.3	1	112.5	0	9.6	0	9.6	0	9.6	0	9.6	0	11.8
300	1	55	0	1	1	0	1.5	8.3	4	112.5	0	7.2	0	12.1	1	9.5	0	12.1	0	12.1
301	1	54	0	1	1	1	2	1	1	112.5	0	2.4	0	9.5	0	9.5	0	9.5	0	11.6
302	2	75	0	1	2	1	2.4	2.1	3	112.5	0	5.2	0	8.1	0	8.1	0	8.1	1	11.2
